# Supplementary material for: Use of the Diabetes Medication Choice Decision Aid in patients with type 2 diabetes in Greece: a cluster randomised trial
Source: PubMed Central journal article supplement — BMJ Open. 2016 Nov 14;6(11):e012185. doi: 10.1136/bmjopen-2016-012185 (PMC5129072; doi:10.1136/bmjopen-2016-012185), 2016-11-14
Supplement: bmjopen-2016-012185supp_tables.pdf [file bmjopen-2016-012185supp_tables.pdf]

## Supplement

**Supplementary table 1** Characteristics of participating practices

| <b>Practice name</b>           | <b>Location</b> | <b>Setting</b> | <b>Level of care</b> | <b>Allocation arm</b> | <b>Patients enrolled (N)</b> |
|--------------------------------|-----------------|----------------|----------------------|-----------------------|------------------------------|
| Serres                         | Serres          | Urban          | Primary              | Usual care            | 33                           |
| Diavata                        | Diavata         | Rural          | Primary              | Usual care            | 28                           |
| Tzavio                         | Athens          | Urban          | Secondary            | Usual care            | 25                           |
| Alexandroupoli                 | Alexandroupoli  | Urban          | Secondary            | Usual care            | 17                           |
| Areteos                        | Thessaloniki    | Urban          | Primary              | Decision aid          | 30                           |
| Michaniona                     | Michaniona      | Rural          | Primary              | Decision aid          | 24                           |
| Nimts                          | Athens          | Urban          | Secondary            | Decision aid          | 30                           |
| Athens Polyclinic              | Athens          | Urban          | Secondary            | Decision aid          | 11                           |
| Athens Laiko General Hospital* | Athens          | Urban          | Secondary            | Decision aid          | 6                            |

\*Practice "Athens Laiko General Hospital" was added post-randomisation, due to inability of practice "Athens Polyclinic" to recruit patients after trial initiation.

**Supplementary table 2** 13-Item modified Decisional Conflict Scale

|                                                                                                             | Strongly agree | Agree | Neither agree nor disagree | Disagree | Strongly disagree |
|-------------------------------------------------------------------------------------------------------------|----------------|-------|----------------------------|----------|-------------------|
| <b>INFORMED Subscale*</b>                                                                                   |                |       |                            |          |                   |
| 1. I know which options are available to me.                                                                |                |       |                            |          |                   |
| 2. I know the benefits of each option.                                                                      |                |       |                            |          |                   |
| 3. I know the risks and side effects of each option.                                                        |                |       |                            |          |                   |
| <b>SUPPORT Subscale*</b>                                                                                    |                |       |                            |          |                   |
| 4. I have enough support from others to make a choice.                                                      |                |       |                            |          |                   |
| 5. I am choosing without pressure from others.                                                              |                |       |                            |          |                   |
| 6. I have enough advice to make a choice.                                                                   |                |       |                            |          |                   |
| <b>EFFECTIVE DECISION Subscale*</b>                                                                         |                |       |                            |          |                   |
| 7. My decision shows what is important to me.                                                               |                |       |                            |          |                   |
| 8. I feel I have made an informed choice.                                                                   |                |       |                            |          |                   |
| 9. I expect to stick with my decision.                                                                      |                |       |                            |          |                   |
| 10. I am satisfied with my decision.                                                                        |                |       |                            |          |                   |
| <b>ADDITIONAL ITEMS†</b>                                                                                    |                |       |                            |          |                   |
| 11. I am now in a better position to make a decision about starting a medicine to control my blood sugar.   |                |       |                            |          |                   |
| 12. My clinician explained to me both the pros and the cons of starting a medicine.                         |                |       |                            |          |                   |
| 13. I am satisfied with the conversation I had with my clinician.                                           |                |       |                            |          |                   |
| * Items for these subscales are from the original, validated 16-item Decisional Conflict Scale <sup>1</sup> |                |       |                            |          |                   |
| † Items 11-13 are not part of the original, validated 16-item Decisional Conflict Scale                     |                |       |                            |          |                   |

Reference

1. O'Connor AM. Validation of a decisional conflict scale. *Med Decis Making* 1995;15:25-30

**Supplementary table 3** Patient's Knowledge questionnaire

|                                                                                                                                            | True | False | Not sure |
|--------------------------------------------------------------------------------------------------------------------------------------------|------|-------|----------|
| A. The only way to control diabetes is by using insulin.                                                                                   |      |       |          |
| B. Diabetes medicines can cause a person to gain weight.                                                                                   |      |       |          |
| C. Some diabetes medicines can lower sugar levels in the blood to the point where one feels sick (hypoglycaemia).                          |      |       |          |
| D. Because of its side effects, doctors should give insulin only after all other medicines have failed to control diabetes.                |      |       |          |
| E. On average, all diabetes medicines (other than insulin) have similar ability to lower haemoglobin A1c (measure of blood sugar control). |      |       |          |
| F. The main adverse effects of insulin are weight gain and feeling sick from low blood sugar (hypoglycaemia).                              |      |       |          |

**Supplementary table 4** Patient and clinician satisfaction

| <b>Patient satisfaction</b>                                                                                                | Strongly agree | Agree | Neither agree nor disagree | Disagree | Strongly disagree |
|----------------------------------------------------------------------------------------------------------------------------|----------------|-------|----------------------------|----------|-------------------|
| I am satisfied with my decision.                                                                                           |                |       |                            |          |                   |
| I am satisfied with the conversation I had with my clinician.                                                              |                |       |                            |          |                   |
| <b>Clinician satisfaction</b>                                                                                              | Completely     | Very  | Somewhat                   | Poorly   | Not at all        |
| To what extent do you feel satisfied with the discussion you had about diabetes medications with the patient you just saw? |                |       |                            |          |                   |

**Supplementary table 5** Sensitivity analysis results

| <b>Outcomes</b>                                                         | <b>Usual care<br/>(N=103)</b> | <b>Decision<br/>aid<br/>(N=95)</b> | <b>Mean<br/>difference</b> | <b>P value</b> | <b>ICC</b> |
|-------------------------------------------------------------------------|-------------------------------|------------------------------------|----------------------------|----------------|------------|
| Overall<br>Decisional<br>Comfort; 0-100,<br>100=no conflict<br>(95% CI) | 75.1 (61.0 to<br>89.2)        | 82.4 (67.7,<br>97.1)               | -7.3 (-23.1,<br>8.5)       | 0.30           | 0.32       |
| Informed<br>subscale (95%<br>CI)                                        | 65.4 (44.3 to<br>86.5)        | 79.9 (58.5,<br>100)                | -14.6 (-37.6,<br>8.5)      | 0.17           | 0.27       |
| Support<br>subscale (95%<br>CI)                                         | 77.6 (61.3 to<br>93.9)        | 81.6 (65.1,<br>98.1)               | -4.0 (-21.7,<br>13.7)      | 0.60           | 0.31       |
| Effective<br>subscale (95%<br>CI)                                       | 80.5 (69.9 to<br>91.1)        | 84.8 (73.8,<br>95.7)               | -4.2 (-16.0,<br>7.5)       | 0.41           | 0.20       |
